# Supplementary material
Source: PubMed Central journal article supplement (PMC6646192)
Supplement: ao8b01536_si_001.pdf [file ao8b01536_si_001.pdf]

## **Folded structure and membrane affinity of the N-terminal domain of the three human isoforms of the mitochondrial voltage-dependent anion-selective channel**

Giorgia Manzo,<sup>#,+,^</sup> Ilaria Serra,<sup>#,+</sup> Andrea Magrí,<sup>†</sup> Mariano Casu,<sup>#</sup> Vito De Pinto,<sup>†</sup> Matteo Ceccarelli,<sup>§</sup>  
Mariano Andrea Scorciapino<sup>#,¶,\*</sup>

<sup>#</sup> University of Cagliari, Department of Chemical and Geological Sciences, Cittadella Universitaria di Monserrato – S.P. 8 km 0.700, 09042, Monserrato (CA), Italy

<sup>†</sup> University of Catania, Department of Biomedicine and Biotechnology, Section of Biology and Genetics, Via Santa Sofia 97, 95123, Catania, Italy

<sup>§</sup> University of Cagliari, Department of Physics, Cittadella Universitaria di Monserrato – S.P. 8 km 0.700, 09042, Monserrato (CA), Italy

<sup>¶</sup> University of Cagliari, Department of Biomedical Sciences, Biochemistry Unit, Cittadella Universitaria di Monserrato – S.P. 8 km 0.700, 09042, Monserrato (CA), Italy

<sup>+</sup> These authors equally contributed to the present work

\* Corresponding author:

**Mariano Andrea Scorciapino**

University of Cagliari

Department of Chemical and Geological Sciences

Cittadella Universitaria di Monserrato – S.P. 8 km 0,700

09042 – Monserrato (CA) – Italy

e-mail: scorciapino@unica.it

phone: +39-070-675-3921

## SUPPORTING INFORMATION

**Table S1.**  $^1\text{H}$  and  $^{13}\text{C}$  resonance assignments for hVDAC1(1-25) in the presence dodecylphosphocholine micelles at a peptide/detergent molar ratio of 1:50 in phosphate buffer saline at pH 7.4.

| Residue    | $^1\text{H}$ (ppm)  |                   |                                                                                                      | $^{13}\text{C}$ (ppm) |                  |
|------------|---------------------|-------------------|------------------------------------------------------------------------------------------------------|-----------------------|------------------|
|            | $\text{H}_\text{N}$ | $\text{H}_\alpha$ | Others                                                                                               | $\text{C}_\alpha$     | $\text{C}_\beta$ |
| <b>M1</b>  | ---                 | 4.08              | 2.14 $\beta$<br>2.54 $\gamma$<br>1.39 $\epsilon$                                                     | 54.65                 | 32.65            |
| <b>A2</b>  | 8.63                | 4.48              | 1.33 $\beta$                                                                                         | 51.37                 | 19.34            |
| <b>V3</b>  | 8.32                | 4.25              | 2.03 $\beta$<br>0.95 $\gamma$                                                                        | 59.44                 | 32.37            |
| <b>P4</b>  |                     | 4.38              | --- $\beta$<br>--- $\gamma$<br>2.95 $\delta$                                                         | ---                   | ---              |
| <b>P5</b>  |                     | 4.41              | 2.34 $\beta$<br>2.06 $\gamma'$<br>1.97 $\gamma''$<br>3.78 $\delta$                                   | ---                   | ---              |
| <b>T6</b>  | 7.78                | 4.24              | 4.15 $\beta$<br>1.12 $\gamma$                                                                        | 62.01                 | 69.64            |
| <b>Y7</b>  | 8.13                | 4.40              | 3.09 $\beta'$<br>2.90 $\beta''$<br>7.02 $\delta$<br>6.77 $\epsilon$                                  | 60.10                 | ---              |
| <b>A8</b>  | 8.85                | 4.40              | 1.36 $\beta$                                                                                         | 52.05                 | 19.00            |
| <b>D9</b>  | 8.17                | 4.53              | 2.79 $\beta'$<br>2.78 $\beta''$                                                                      | 55.56                 | 39.42            |
| <b>L10</b> | 7.92                | 4.14              | 1.86 $\beta$<br>1.79 $\gamma'$<br>1.70 $\gamma''$<br>0.96 $\delta_1$<br>0.93 $\delta_2$              | 57.31                 | 41.55            |
| <b>G11</b> | 7.90                | 3.82<br>3.75      |                                                                                                      | 45.24                 |                  |
| <b>K12</b> | 7.97                | 4.01              | 1.95 $\beta$<br>1.54 $\gamma'$<br>1.47 $\gamma''$<br>1.71 $\delta$<br>2.98 $\epsilon$<br>--- $\zeta$ | 59.14                 | 31.99            |
| <b>S13</b> | 8.11                | 4.31              | 4.01 $\beta'$<br>3.89 $\beta''$                                                                      | 61.63                 | 62.69            |
| <b>A14</b> | 8.39                | 4.01              | 1.47 $\beta$                                                                                         | 54.58                 | 18.00            |
| <b>R15</b> | 8.13                | 3.97              | 2.07 $\beta'$                                                                                        | 59.24                 | ---              |

|            |       |              |                                                                                                         |        |       |
|------------|-------|--------------|---------------------------------------------------------------------------------------------------------|--------|-------|
|            |       |              | 1.91 $\beta''$<br>1.78 $\gamma'$<br>1.67 $\gamma''$<br>3.21 $\delta$<br>7.55 $\varepsilon$              |        |       |
| <b>D16</b> | 8.20  | 4.51         | 2.96 $\beta'$<br>2.76 $\beta''$                                                                         | 56.26  | 39.33 |
| <b>V17</b> | 7.89  | 3.75         | 2.10 $\beta$<br>1.00 $\gamma_1$<br>0.75 $\gamma_2$                                                      | 65.34  | 31.32 |
| <b>F18</b> | 8.00  | 4.39         | 3.26 $\beta'$<br>3.08 $\beta''$<br>7.14 $\delta$<br>7.24 $\varepsilon$<br>--- $\zeta$                   | 59.41  | 39.05 |
| <b>T19</b> | 8.16  | 4.16         | 4.32 $\beta$<br>1.31 $\gamma$                                                                           | 63.92  | 67.98 |
| <b>K20</b> | 7.99  | 4.24         | 1.83 $\beta$<br>1.50 $\gamma'$<br>1.42 $\gamma''$<br>1.63 $\delta$<br>2.93 $\varepsilon$<br>--- $\zeta$ | 57.10  | 32.37 |
| <b>G21</b> | 8.11  | 3.78         |                                                                                                         | ---    |       |
| <b>Y22</b> | 8.01  | 4.36         | 2.92 $\beta'$<br>2.77 $\beta''$<br>6.97 $\delta$<br>6.73 $\varepsilon$                                  | 58.34  | 38.71 |
| <b>G23</b> | 8.08  | 3.85<br>3.74 |                                                                                                         | ---    |       |
| <b>F24</b> | 7.90  | 4.59         | 3.20 $\beta'$<br>2.94 $\beta''$<br>--- $\delta$<br>7.27 $\varepsilon$<br>--- $\zeta$                    | 57.32  | 39.45 |
| <b>G25</b> | 8.134 | 3.782        |                                                                                                         | 44.901 |       |

**Table S2.**  $^1\text{H}$  and  $^{13}\text{C}$  resonance assignments for hVDAC2(12-36) in the presence dodecylphosphocholine micelles at a peptide/detergent molar ratio of 1:50 in phosphate buffer saline at pH 7.4.

| Residue    | $^1\text{H}$ (ppm)  |                   |                                                                                                      | $^{13}\text{C}$ (ppm) |                  |
|------------|---------------------|-------------------|------------------------------------------------------------------------------------------------------|-----------------------|------------------|
|            | $\text{H}_\text{N}$ | $\text{H}_\alpha$ | Others                                                                                               | $\text{C}_\alpha$     | $\text{C}_\beta$ |
| <b>M1</b>  | ---                 | ---               | ---                                                                                                  | ---                   | ---              |
| <b>C2</b>  | 8.23                | 4.55              | --- $\beta$                                                                                          | ---                   | ---              |
| <b>I3</b>  | 8.21                | 4.17              | 1.75 $\beta$<br>1.51 $\gamma_1'$<br>1.16 $\gamma_1''$<br>--- $\gamma_2$<br>0.84 $\delta_1$           | ---                   | ---              |
| <b>P4</b>  |                     | 4.14              | 2.58 $\beta$<br>2.19 $\gamma$<br>--- $\delta$                                                        | ---                   | ---              |
| <b>P5</b>  |                     | 4.13              | 2.56 $\beta$<br>2.13 $\gamma$<br>--- $\delta$                                                        | ---                   | ---              |
| <b>S6</b>  | 8.57                | 3.85              |                                                                                                      | ---                   | ---              |
| <b>Y7</b>  | 8.28                | 4.42              | 2.99 $\beta'$<br>2.71 $\beta''$<br>7.17 $\delta$<br>--- $\epsilon$                                   | 58.05                 | ---              |
| <b>A8</b>  | 8.15                | 4.11              | 1.43 $\beta$                                                                                         | 54.74                 | 17.99            |
| <b>D9</b>  | 8.22                | 4.43              | 2.99 $\beta'$<br>2.73 $\beta''$                                                                      | 58.05                 | ---              |
| <b>L10</b> | 8.47                | 4.36              | 1.88 $\beta$<br>--- $\gamma$<br>0.95 $\delta$                                                        | ---                   | ---              |
| <b>G11</b> | 8.05                | 3.88<br>3.78      |                                                                                                      | ---                   |                  |
| <b>K12</b> | 7.96                | 3.99              | 1.96 $\beta$<br>1.59 $\gamma'$<br>1.46 $\gamma''$<br>1.74 $\delta$<br>3.00 $\epsilon$<br>--- $\zeta$ | 59.53                 | ---              |
| <b>A13</b> | 8.06                | 4.05              | 1.46 $\beta$                                                                                         | ---                   | 17.99            |
| <b>A14</b> | 8.41                | 4.00              | 1.50 $\beta$                                                                                         | ---                   | 17.99            |
| <b>R15</b> | 7.84                | 4.25              | 1.89 $\beta$<br>1.56 $\gamma$<br>2.96 $\delta$<br>--- $\epsilon$                                     | ---                   | ---              |
| <b>D16</b> | ---                 | 4.53              | 2.88 $\beta'$<br>2.72 $\beta''$                                                                      | 57.65                 | 28.11            |
| <b>I17</b> | 8.05                | 4.34              | 1.73 $\beta$<br>1.58 $\gamma_1'$<br>1.18 $\gamma_1''$<br>--- $\gamma_2$<br>0.85 $\delta_1$           | 58.06                 | ---              |
| <b>F18</b> | 8.30                | 4.44              | 3.13 $\beta'$<br>2.95 $\beta''$                                                                      | 58.06                 | ---              |

|            |      |              |                                                                                                         |       |     |
|------------|------|--------------|---------------------------------------------------------------------------------------------------------|-------|-----|
|            |      |              | 7.06 $\delta$<br>--- $\varepsilon$<br>--- $\zeta$                                                       |       |     |
| <b>N19</b> | 7.97 | 4.17         | 2.35 $\beta'$<br>2.07 $\beta''$<br>--- $\delta$                                                         | 61.17 | --- |
| <b>K20</b> | 8.03 | 4.22         | 1.89 $\beta$<br>1.55 $\gamma'$<br>1.46 $\gamma''$<br>1.65 $\delta$<br>2.95 $\varepsilon$<br>--- $\zeta$ | 61.09 | --- |
| <b>G21</b> | 8.13 | 3.94<br>3.83 |                                                                                                         | ---   |     |
| <b>F22</b> | 8.31 | 4.16         | 3.28 $\beta'$<br>3.11 $\beta''$<br>7.24 $\delta$<br>--- $\varepsilon$<br>--- $\zeta$                    | ---   | --- |
| <b>G23</b> | 8.09 | 3.81         |                                                                                                         | ---   |     |
| <b>F24</b> | 8.01 | 4.59         | 3.21 $\beta'$<br>3.03 $\beta''$<br>--- $\delta$<br>7.30 $\varepsilon$<br>--- $\zeta$                    | ---   | --- |
| <b>G25</b> | ---  | ---          |                                                                                                         | ---   |     |

**Table S3.**  $^1\text{H}$  and  $^{13}\text{C}$  resonance assignments for hVDAC3(1-25) in the presence dodecylphosphocholine micelles at a peptide/detergent molar ratio of 1:50 in phosphate buffer saline at pH 7.4.

| Residue    | $^1\text{H}$ (ppm)  |                   |                                                                                                         | $^{13}\text{C}$ (ppm) |                  |
|------------|---------------------|-------------------|---------------------------------------------------------------------------------------------------------|-----------------------|------------------|
|            | $\text{H}_\text{N}$ | $\text{H}_\alpha$ | Others                                                                                                  | $\text{C}_\alpha$     | $\text{C}_\beta$ |
| <b>M1</b>  | ---                 | 4.14              | 2.18 $\beta$<br>2.65 $\gamma$<br>--- $\varepsilon$                                                      | 54.81                 | 32.75            |
| <b>C2</b>  | 8.01                | 4.36              | 2.85 $\beta$                                                                                            | ---                   | ---              |
| <b>N3</b>  | 8.62                | ---               | 2.80 $\beta'$<br>2.75 $\beta''$<br>7.66 $\delta'$<br>6.89 $\delta''$                                    | ---                   | 38.75            |
| <b>T4</b>  | 8.09                | 4.49              | 4.13 $\beta$<br>1.24 $\gamma$                                                                           | 58.90                 | 69.03            |
| <b>P5</b>  |                     | 4.58              | 2.29 $\beta$<br>1.97 $\gamma'$<br>1.84 $\gamma''$<br>3.86 $\delta'$<br>3.62 $\delta''$                  | 62.78                 | 31.93            |
| <b>T6</b>  | 8.38                | 4.41              | 4.46 $\beta$<br>1.25 $\gamma$                                                                           | 60.92                 | 70.52            |
| <b>Y7</b>  | 8.58                | 4.32              | 3.08 $\beta$<br>7.10 $\delta$<br>6.80 $\varepsilon$                                                     | 60.44                 | 37.54            |
| <b>C8</b>  | 8.23                | 4.18              | 2.92 $\beta$                                                                                            | ---                   | ---              |
| <b>D9</b>  | 7.98                | ---               | 2.85 $\beta$                                                                                            | ---                   | ---              |
| <b>L10</b> | 8.19                | 4.09              | 1.88 $\beta$<br>1.80 $\gamma'$<br>1.61 $\gamma''$<br>0.92 $\delta_1$<br>0.88 $\delta_2$                 | 57.53                 | ---              |
| <b>G11</b> | 8.49                | 3.82              |                                                                                                         | 44.82                 |                  |
| <b>K12</b> | 7.92                | 3.98              | 1.94 $\beta$<br>--- $\gamma$<br>1.58 $\delta$<br>3.01 $\varepsilon$<br>--- $\zeta$                      | 58.26                 | 32.16            |
| <b>A13</b> | 7.87                | 4.23              | 1.52 $\beta$                                                                                            | 54.45                 | 17.93            |
| <b>A14</b> | 8.38                | 3.98              | 1.48 $\beta$                                                                                            | 54.72                 | 18.08            |
| <b>K15</b> | 8.02                | 3.95              | 1.86 $\beta$<br>1.54 $\gamma'$<br>1.45 $\gamma''$<br>1.65 $\delta$<br>2.95 $\varepsilon$<br>--- $\zeta$ | 59.67                 | ---              |
| <b>D16</b> | 8.12                | 4.55              | 2.89 $\beta'$<br>2.70 $\beta''$                                                                         | 57.06                 | 40.30            |
| <b>V17</b> | 7.98                | 3.74              | 2.18 $\beta$<br>1.06 $\gamma_1$<br>0.86 $\gamma_2$                                                      | 65.82                 | 31.30            |

|            |      |              |                                                                                                        |       |       |
|------------|------|--------------|--------------------------------------------------------------------------------------------------------|-------|-------|
| <b>F18</b> | 8.21 | 4.28         | 3.29 $\beta'$<br>3.09 $\beta''$<br>7.19 $\delta$<br>7.24 $\varepsilon$<br>--- $\zeta$                  | 60.63 | 38.97 |
| <b>N19</b> | 8.43 | 4.54         | 2.97 $\beta'$<br>2.86 $\beta''$<br>7.68 $\delta$                                                       | 54.94 | 38.59 |
| <b>K20</b> | 8.03 | 4.21         | 1.86 $\beta$<br>1.54 $\gamma'$<br>1.45 $\gamma''$<br>1.66 $\delta$<br>--- $\varepsilon$<br>--- $\zeta$ | 57.22 | 32.50 |
| <b>G21</b> | 7.88 | 3.83<br>3.77 |                                                                                                        | ---   |       |
| <b>Y22</b> | 8.07 | 4.33         | 2.86 $\beta'$<br>2.72 $\beta''$<br>6.98 $\delta$<br>6.77 $\varepsilon$                                 | 58.60 | ---   |
| <b>G23</b> | 8.03 | 3.79<br>3.70 |                                                                                                        | 45.23 |       |
| <b>F24</b> | 7.95 | 4.53         | 3.18 $\beta'$<br>3.02 $\beta''$<br>--- $\delta$<br>7.29 $\varepsilon$<br>--- $\zeta$                   | 58.09 | 39.15 |
| <b>G25</b> | 8.04 | 3.71         |                                                                                                        | ---   |       |
